# Supplementary figures and images for: Pain during prolonged sitting in subjects with patellofemoral pain in Dutch physical therapy clinics: an online questionnaire-based analysis
Source: HighWire-hosted journal article supplement (doi:10.1136/bmjopen-2024-086958), 2024-11-01

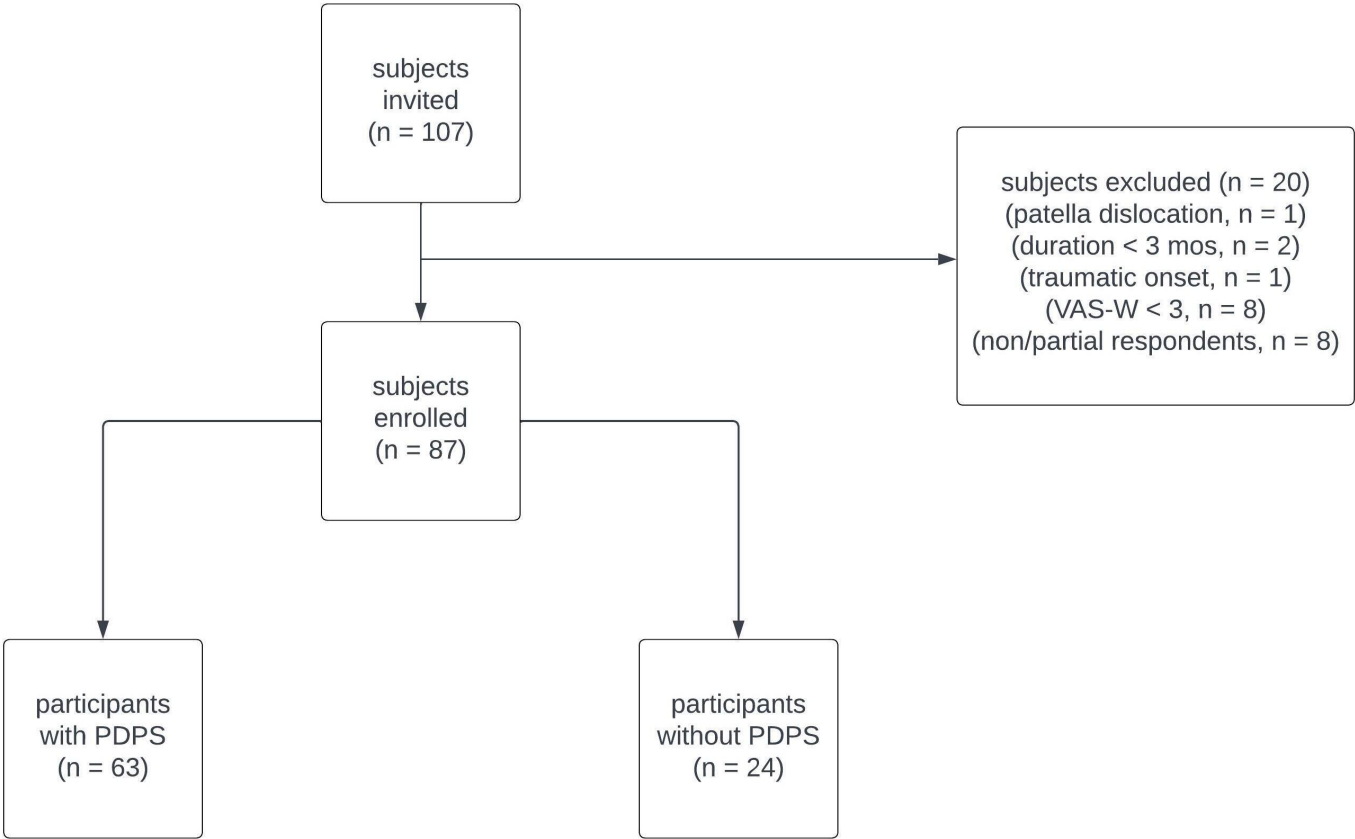

Supplement: bmjopen-2024-086958supp001_data_supplement.pdf [file bmjopen-2024-086958supp001_data_supplement.pdf]
